# Supplementary material
Source: PubMed Central journal article supplement (PMC1360620)

# Supplemental Figure

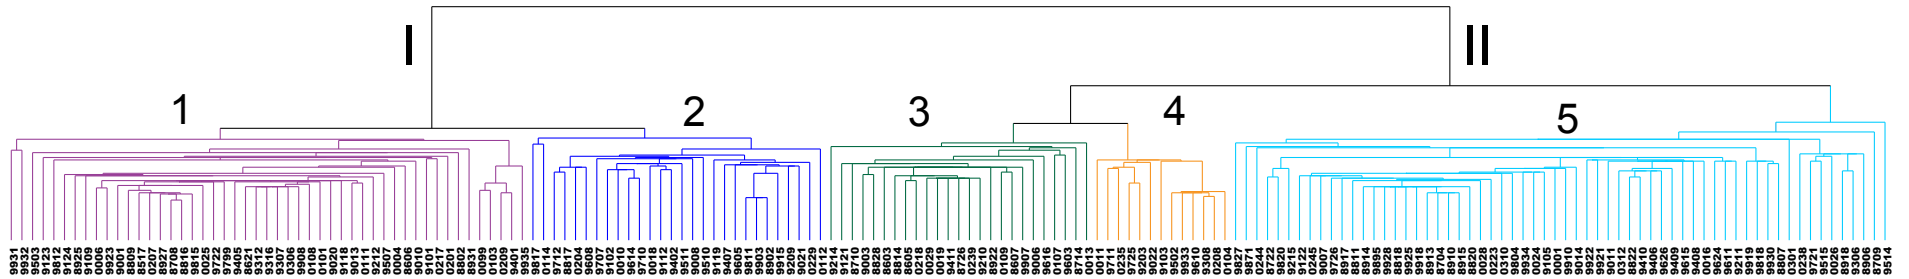

Supplement: pmed.0030013.sg001.pdf [file pmed.0030013.sg001.pdf]
